# Supplementary figures and images for: Synhelminthosporium gen. et sp. nov. and Two New Species of Helminthosporium (Massarinaceae, Pleosporales) from Sichuan Province, China
Source: MDPI journal article supplement (doi:10.3390/jof8070712), 2022-07-05

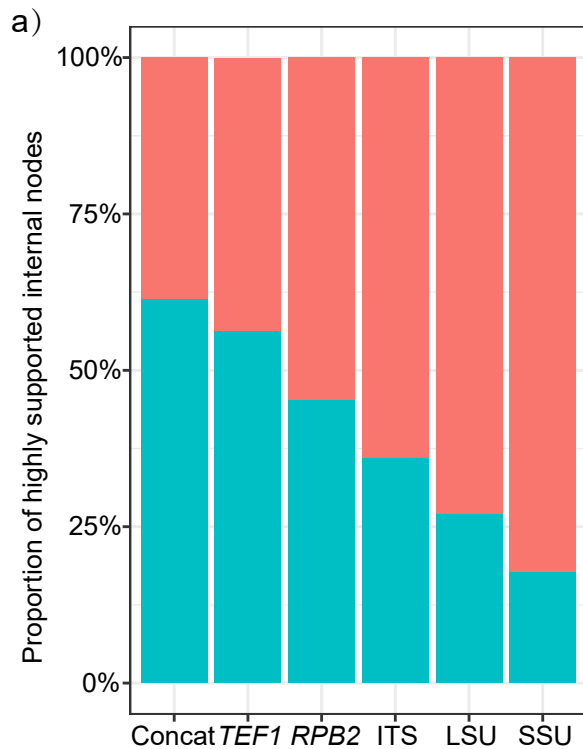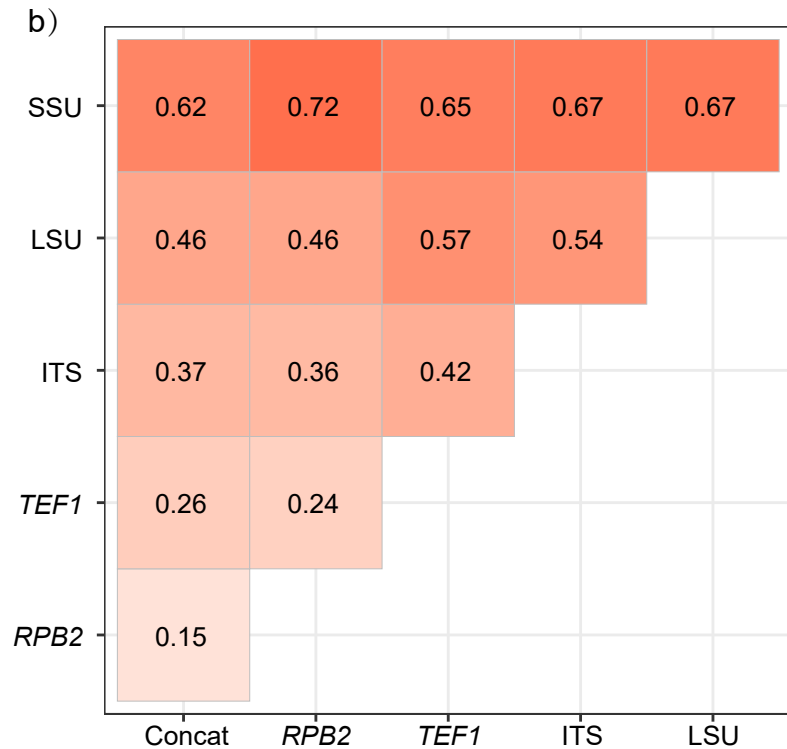

Supplement: s1 [file s1]

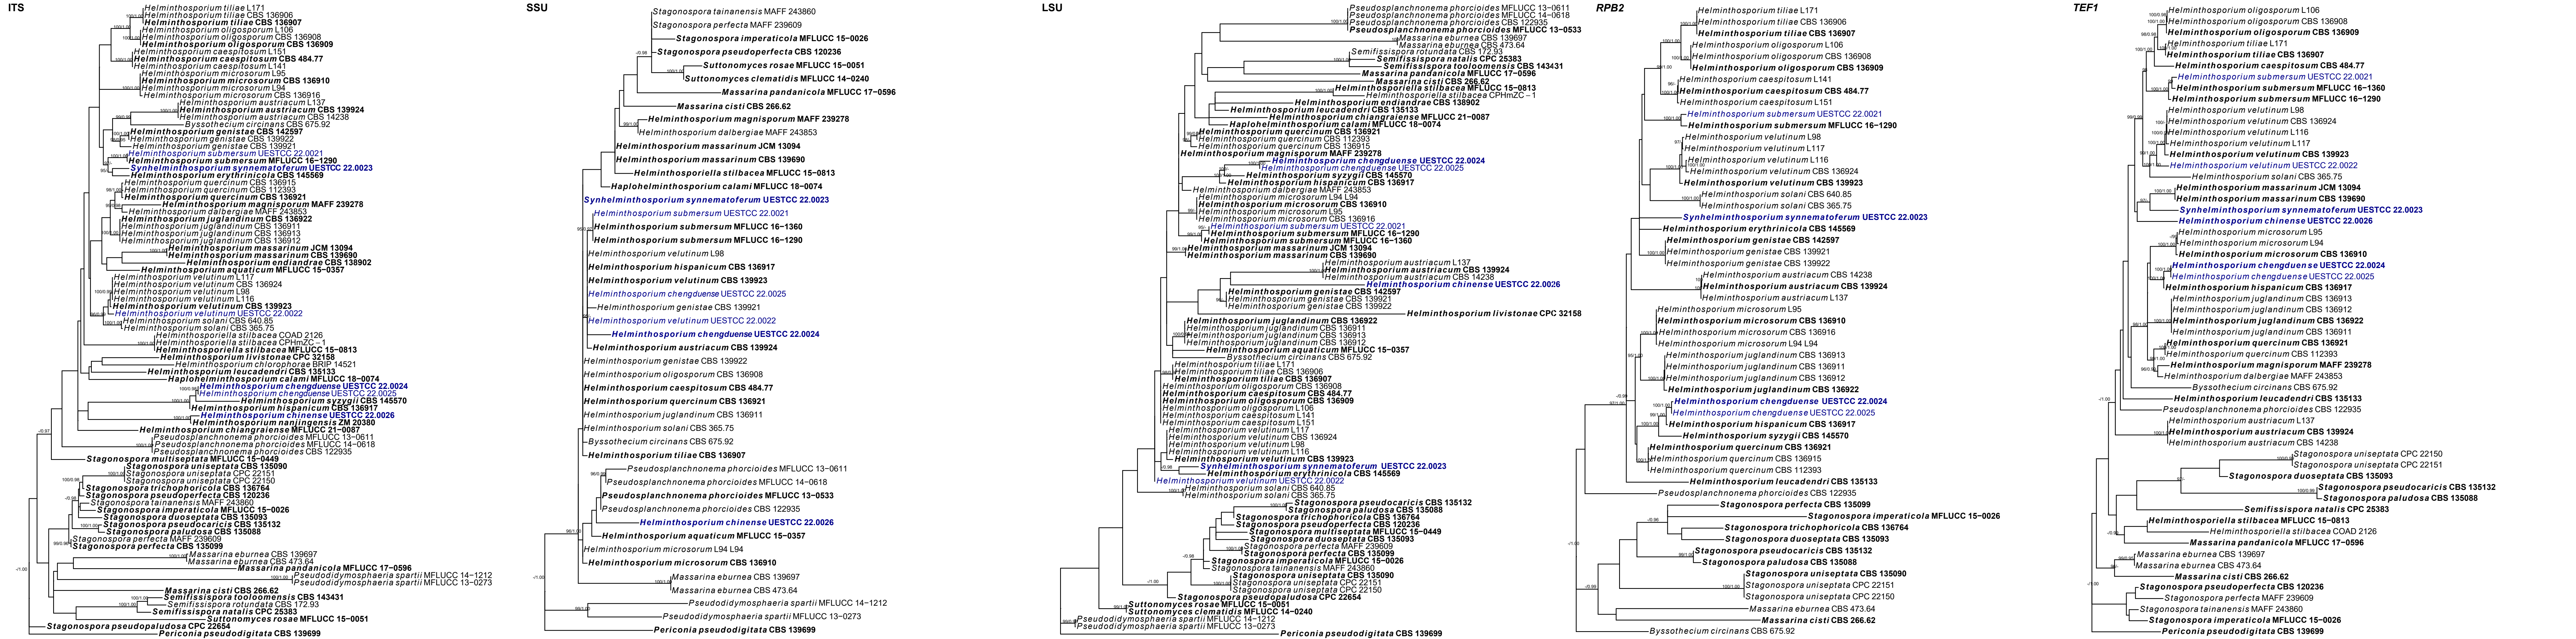

Supplement: s1 [file s1]
